# Supplementary material
Source: Research Square preprint supplement (doi:10.21203/rs.3.rs-10004386/v1)

| **Table S1** Functional assessment of four coating bacterial strains | | | | | | | | |
| --- | --- | --- | --- | --- | --- | --- | --- | --- |
| Strain | Top-hit Taxon | ANI Value with the Closest Reference Strain (%) | Patent Number | Amylase (%) | Protease (%) | Cellulase (%) | Inorganic phosphorus solubilization (μg/g) | Potassium-dissolving |
| WN088 | *Priestia aryabhattai* | 99.21 | ZL 202310701097.8 | 3.77±0.49 | 4.36±0.46 | 6.06±0.25 | 0.68±0.20 | - |
| 3-218 | *Flavobacterium erigeronis* | 100.00 | ZL 202411233751.8 | 1.41±0.17 | 3.05±0.27 | 2.32±0.25 | 0.68±0.12 | √ |
| MS11 | *Bradyrhizobium japonicum* | 98.65 | - | - | - | 5.19±0.58 | 0.83±0.18 | √ |
| YB35 | *Bacillus velezensis* | 97.67 | - | - | - | - | 1.37±0.05 | - |

| **Table S2** Analysis of the drivers of bacterial community assembly | | |
| --- | --- | --- |
| Group | Process | Percentage (%) |
| MSC | variable selection | 35.172 |
| homogeneous selection | 0 |
| dispersal limitation | 8.276 |
| homogeneous dispersal | 0.230 |
| drift | 56.322 |
| CK | variable selection | 61.839 |
| homogeneous selection | 0 |
| dispersal limitation | 5.747 |
| homogeneous dispersal | 1.149 |
| drift | 31.264 |

**Fig. S1** Phylogenetic tree of the four coating strains and references constructed using the maximum-likelihood method based on orthologous single-copy core genes


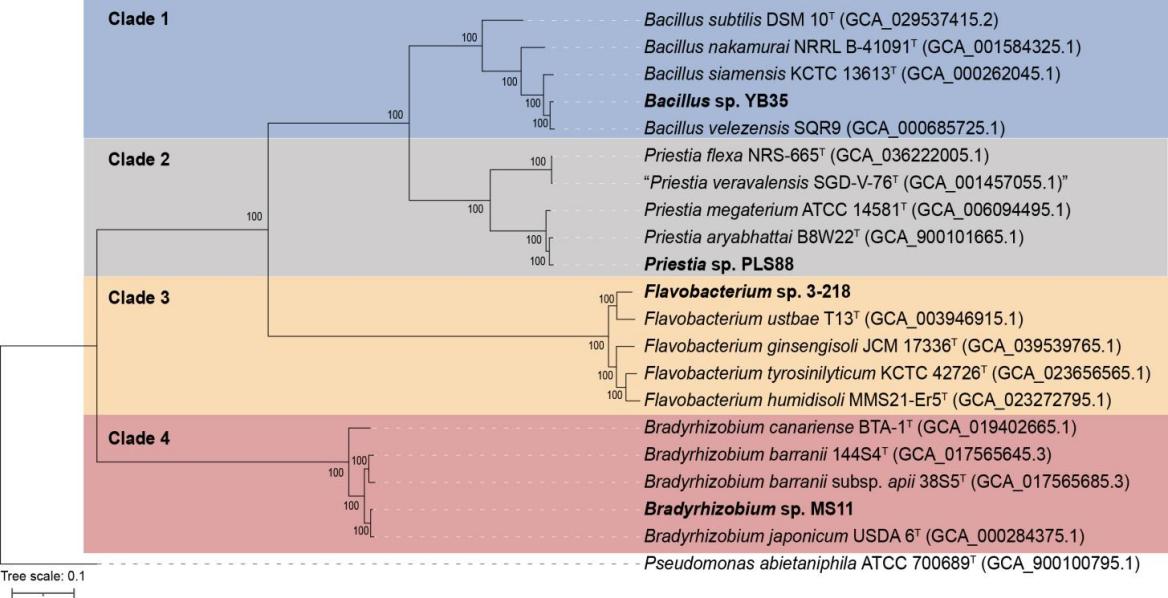


**Fig. S2** Rhizosphere microbial community composition and differential taxa analysis under CK (red) vs MSC (blue) treatments


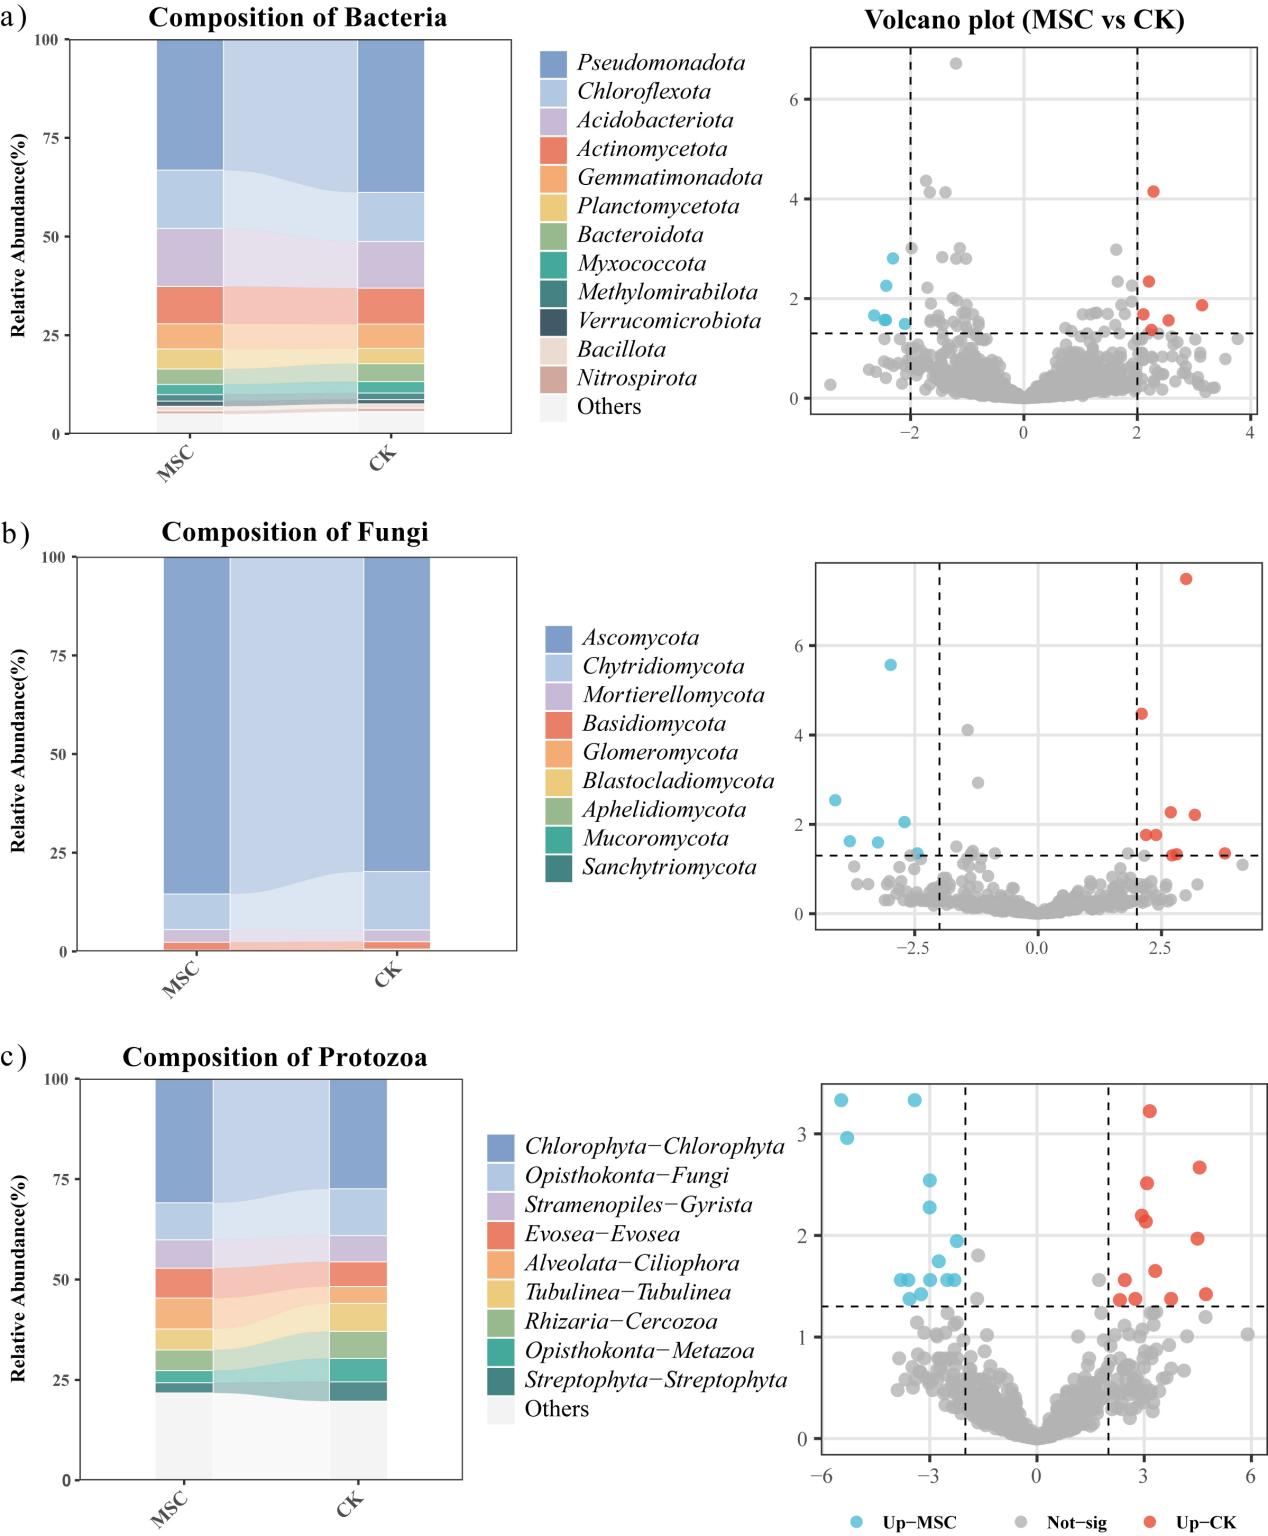


**Fig. S3** Associations between rhizosphere bacterial, fungal, and protozoan communities and maize agronomic traits and yield (Mantel test and Spearman correlation analysis)


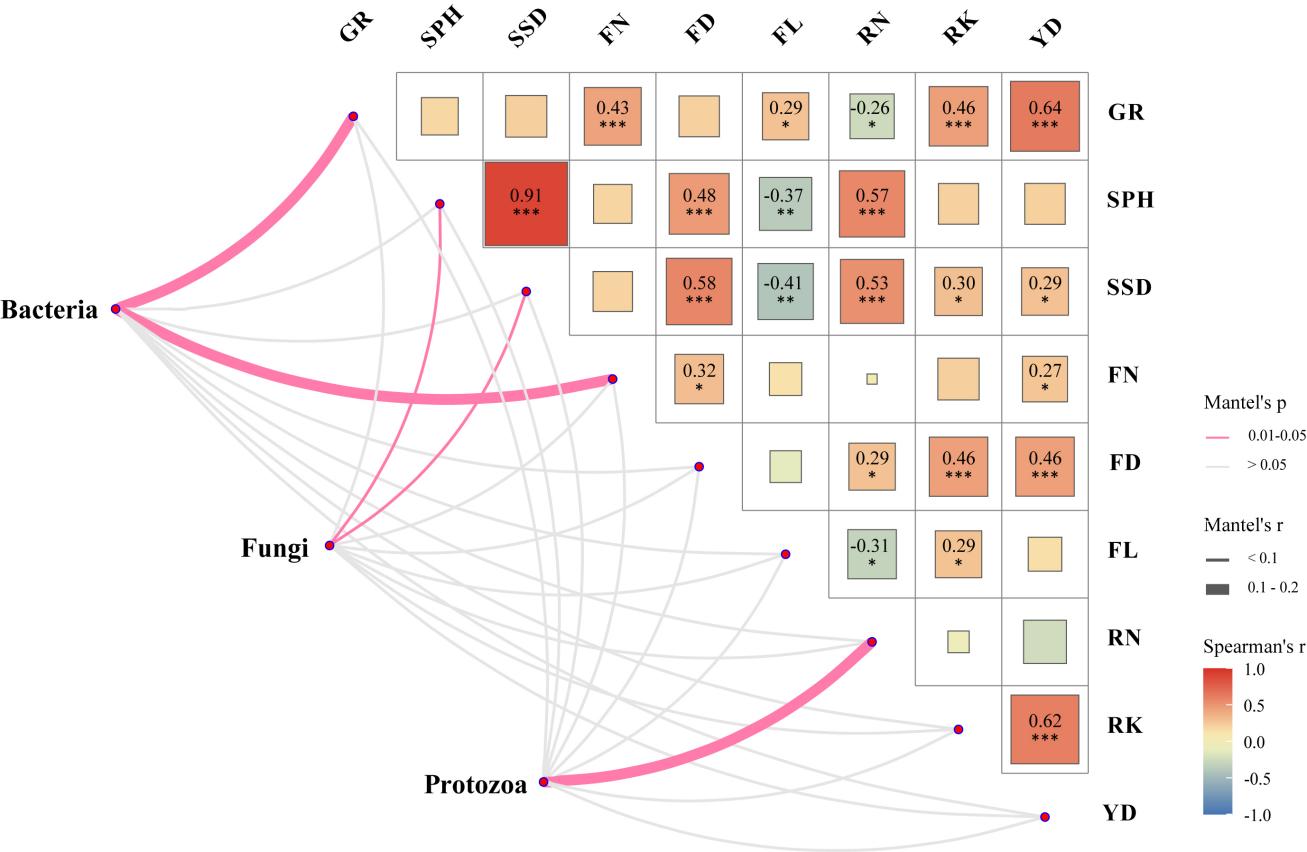


**Fig. S4** Bacterial co-occurrence networks and node roles in maize rhizosphere under CK vs MSC treatments


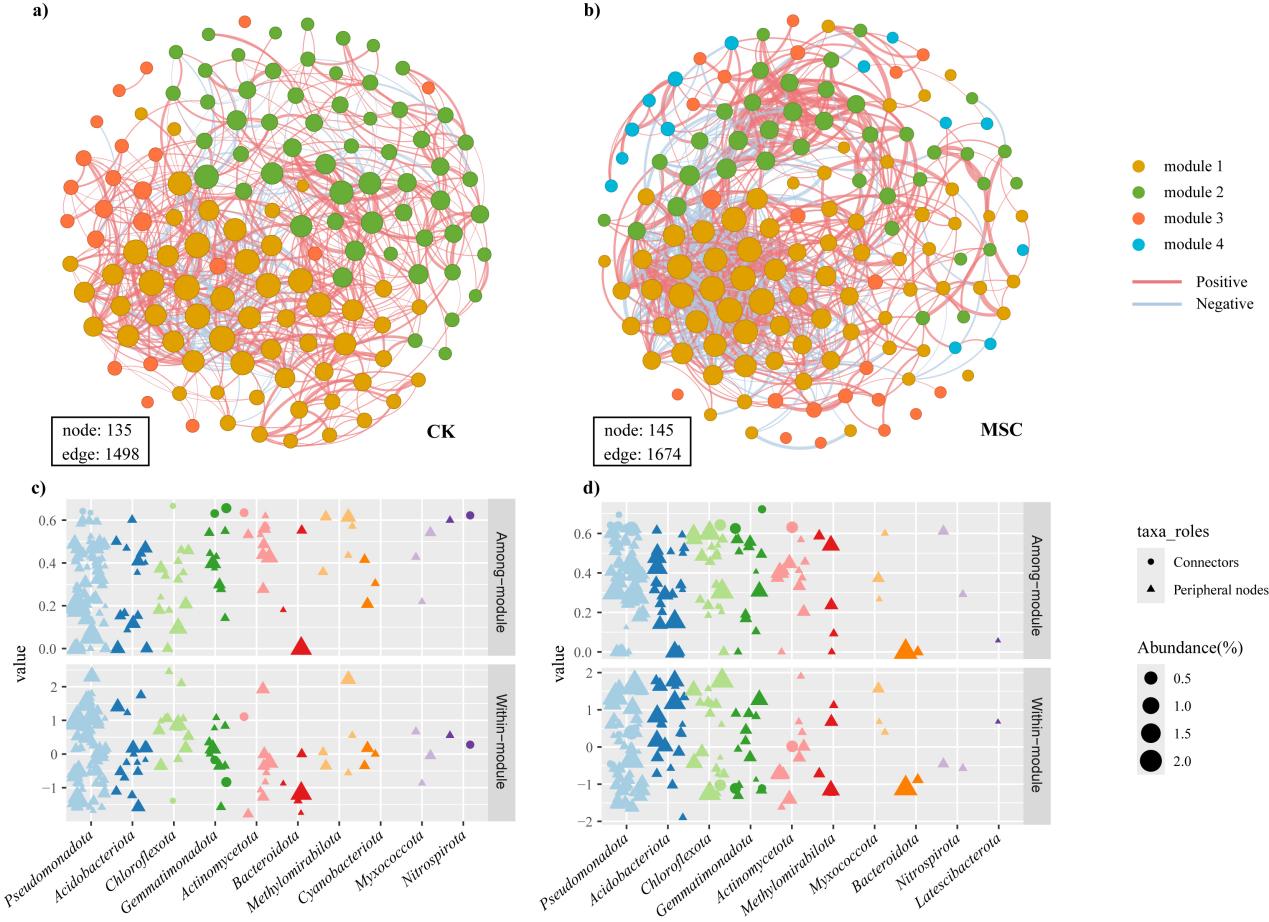


**Fig. S5** Fungal co-occurrence networks and node roles in maize rhizosphere under CK vs MSC treatments


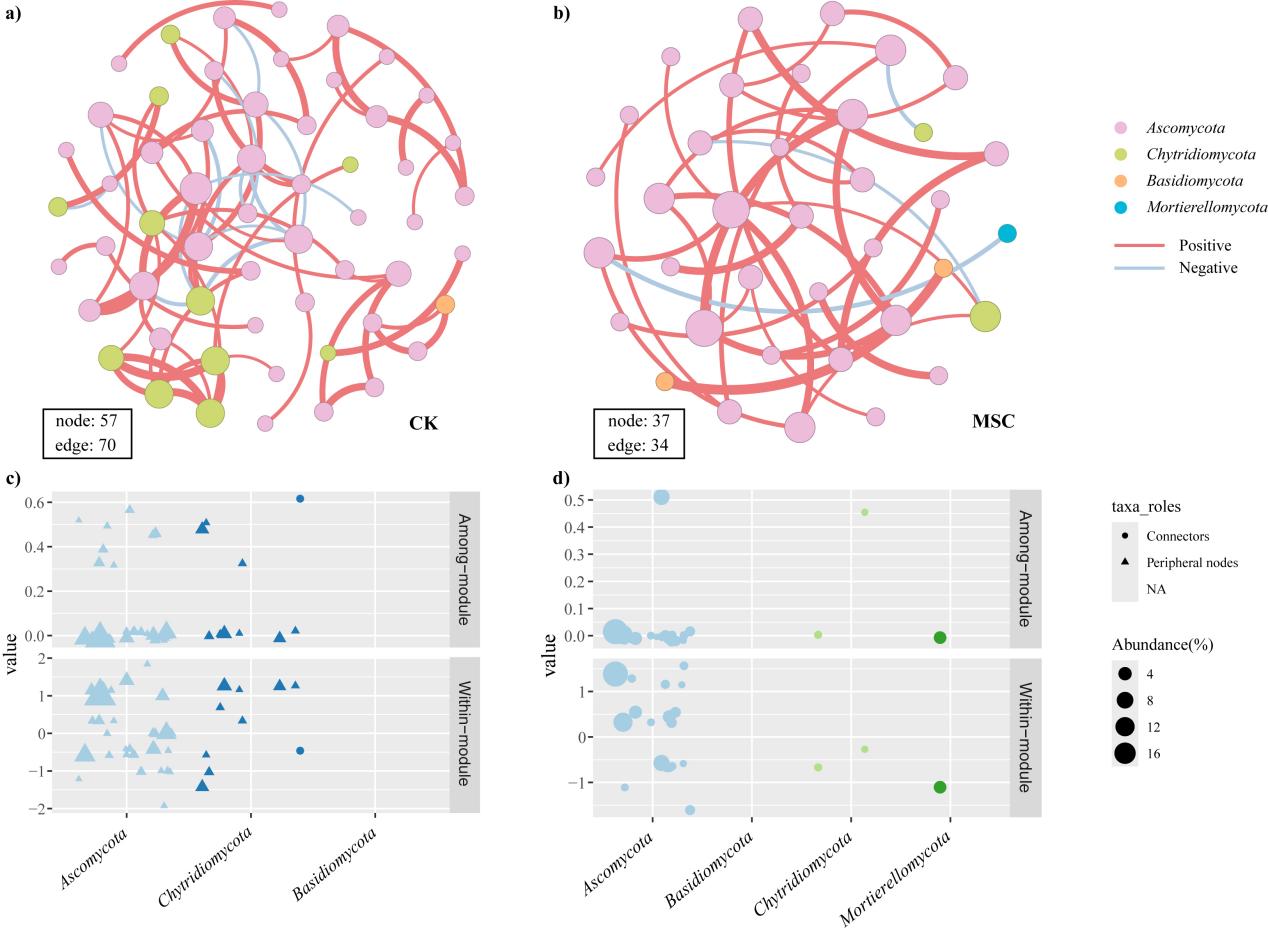


**Fig. S6** Protozoan co-occurrence networks and node roles in maize rhizosphere under CK vs MSC treatments


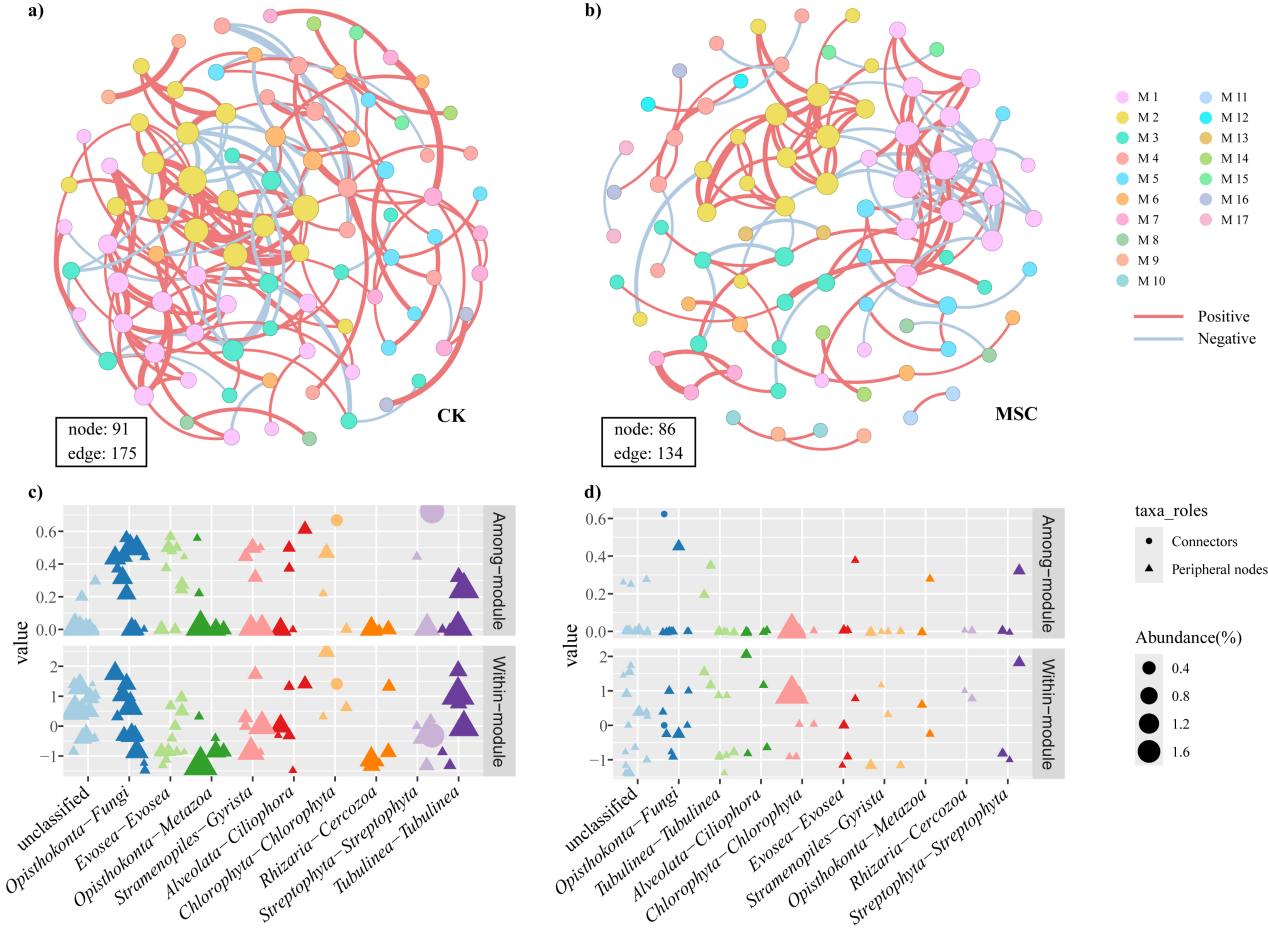


**Fig. S7** Protozoan co-occurrence networks and node roles in maize rhizosphere under CK vs MSC treatments


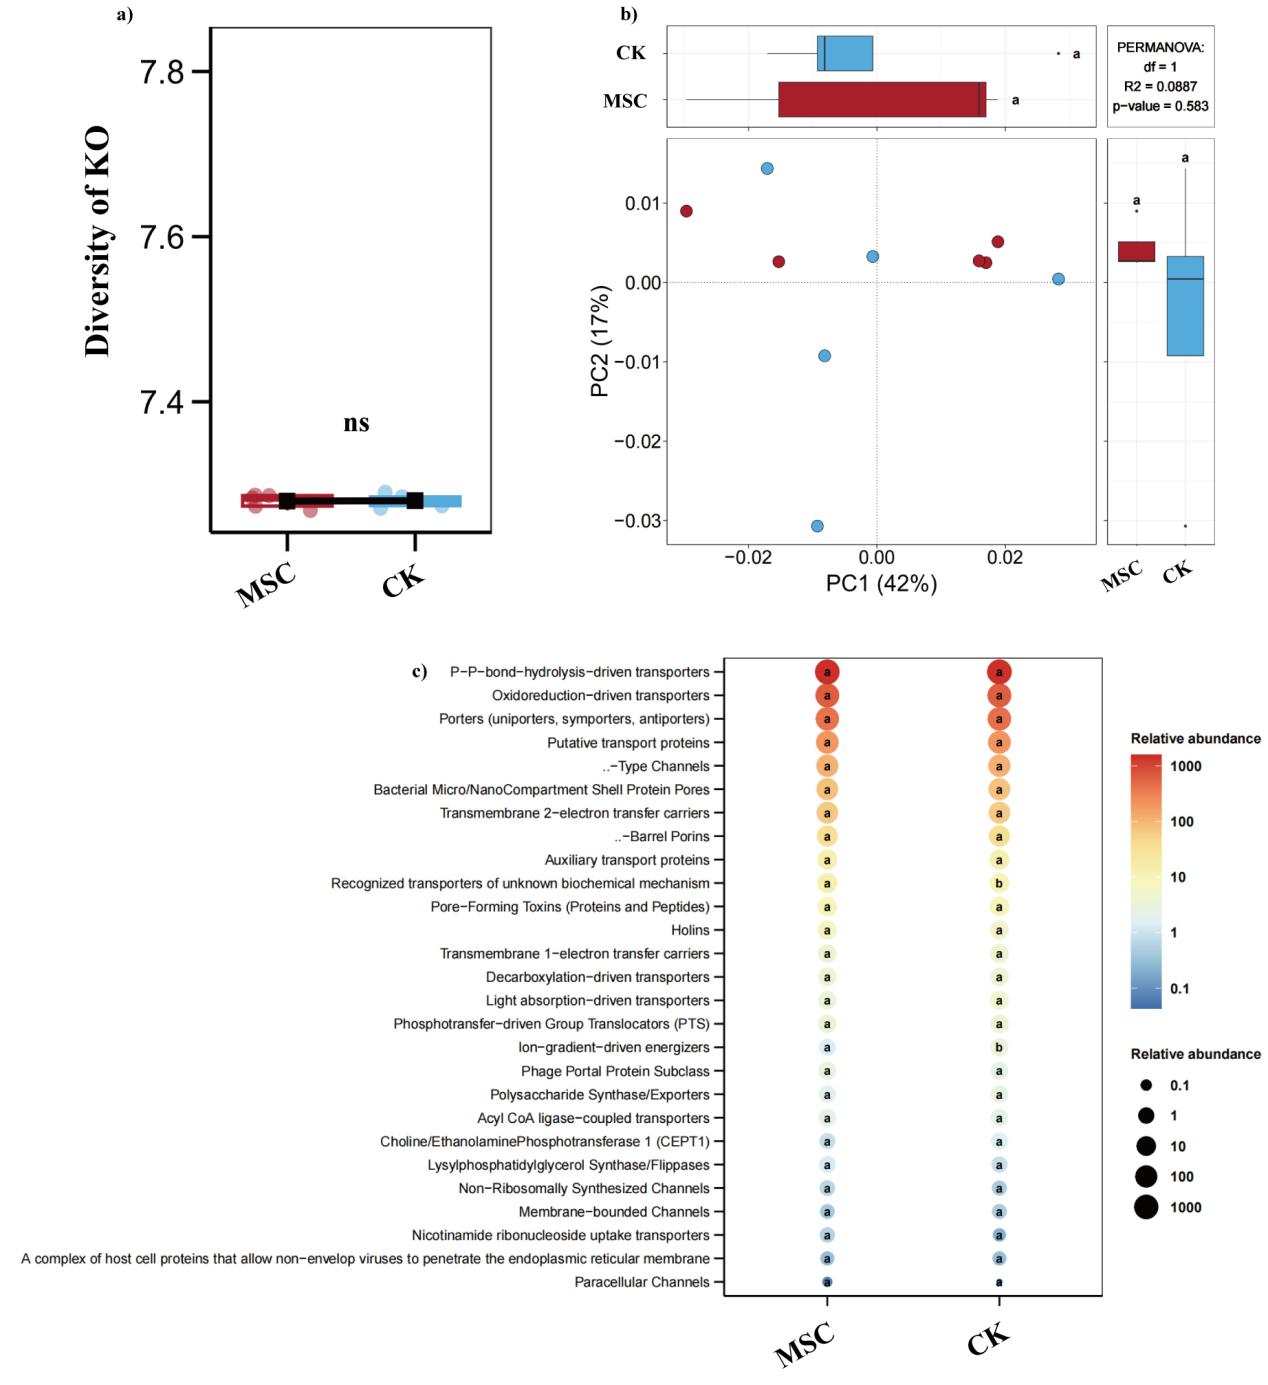

Supplement: Supplementary file 1 [file b59b9368d3f1e27dabda664f.docx]
