# Supplementary material
Source: Research Square preprint supplement (doi:10.21203/rs.3.rs-10004386/v1)

**Graphic Abstract**


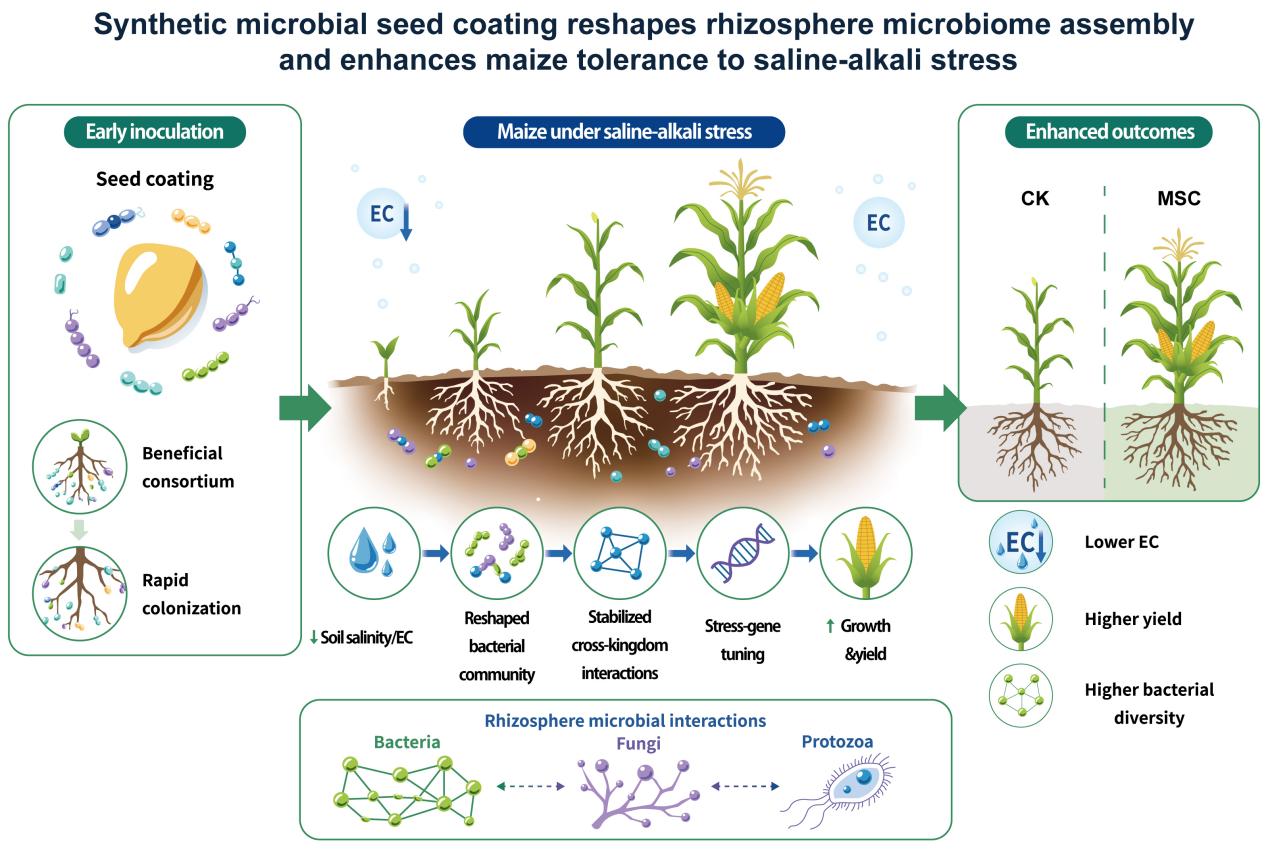

Supplement: Supplementary file 2 [file ef4c4b1d5e32311dfbedebe9.docx]
